# Supplementary material
Source: PubMed Central journal article supplement (PMC4135944)
Supplement: JVI.01257-14_zjv999099304so1.pdf [file JVI.01257-14_zjv999099304so1.pdf]

1 **Supplemental Figure Legends**

2

3 **Supplemental Figure 1.** Dot plots of cell types as percentages of total lymphocytes,  
4 coded by subject number, with mean (long black line) and median (short black line).

5

6 **Supplemental Figure 2.** Dot plots of CD4<sup>+</sup> cell subsets as percentages of total CD4<sup>+</sup>  
7 count, coded by subject number, with mean (long black line) and median (short black  
8 line).

9

10 **Supplemental Figure 3.** Dot plots of CD8<sup>+</sup> cell subsets as percentages of total CD8<sup>+</sup>  
11 count, coded by subject number, with mean (long black line) and median (short black  
12 line).

13

14 **Supplemental Figure 4.** Dot plots of plasma cytokine levels (log(pg/ml)), coded by  
15 subject number, with mean (long black line) and median (short black line).

16

17 **Supplemental Figure 5.** Dot plots of *env* and *pol* diversity and divergence (percent),  
18 coded by subject number, with mean (long black line) and median (short black line).

# Supplemental Figure 1

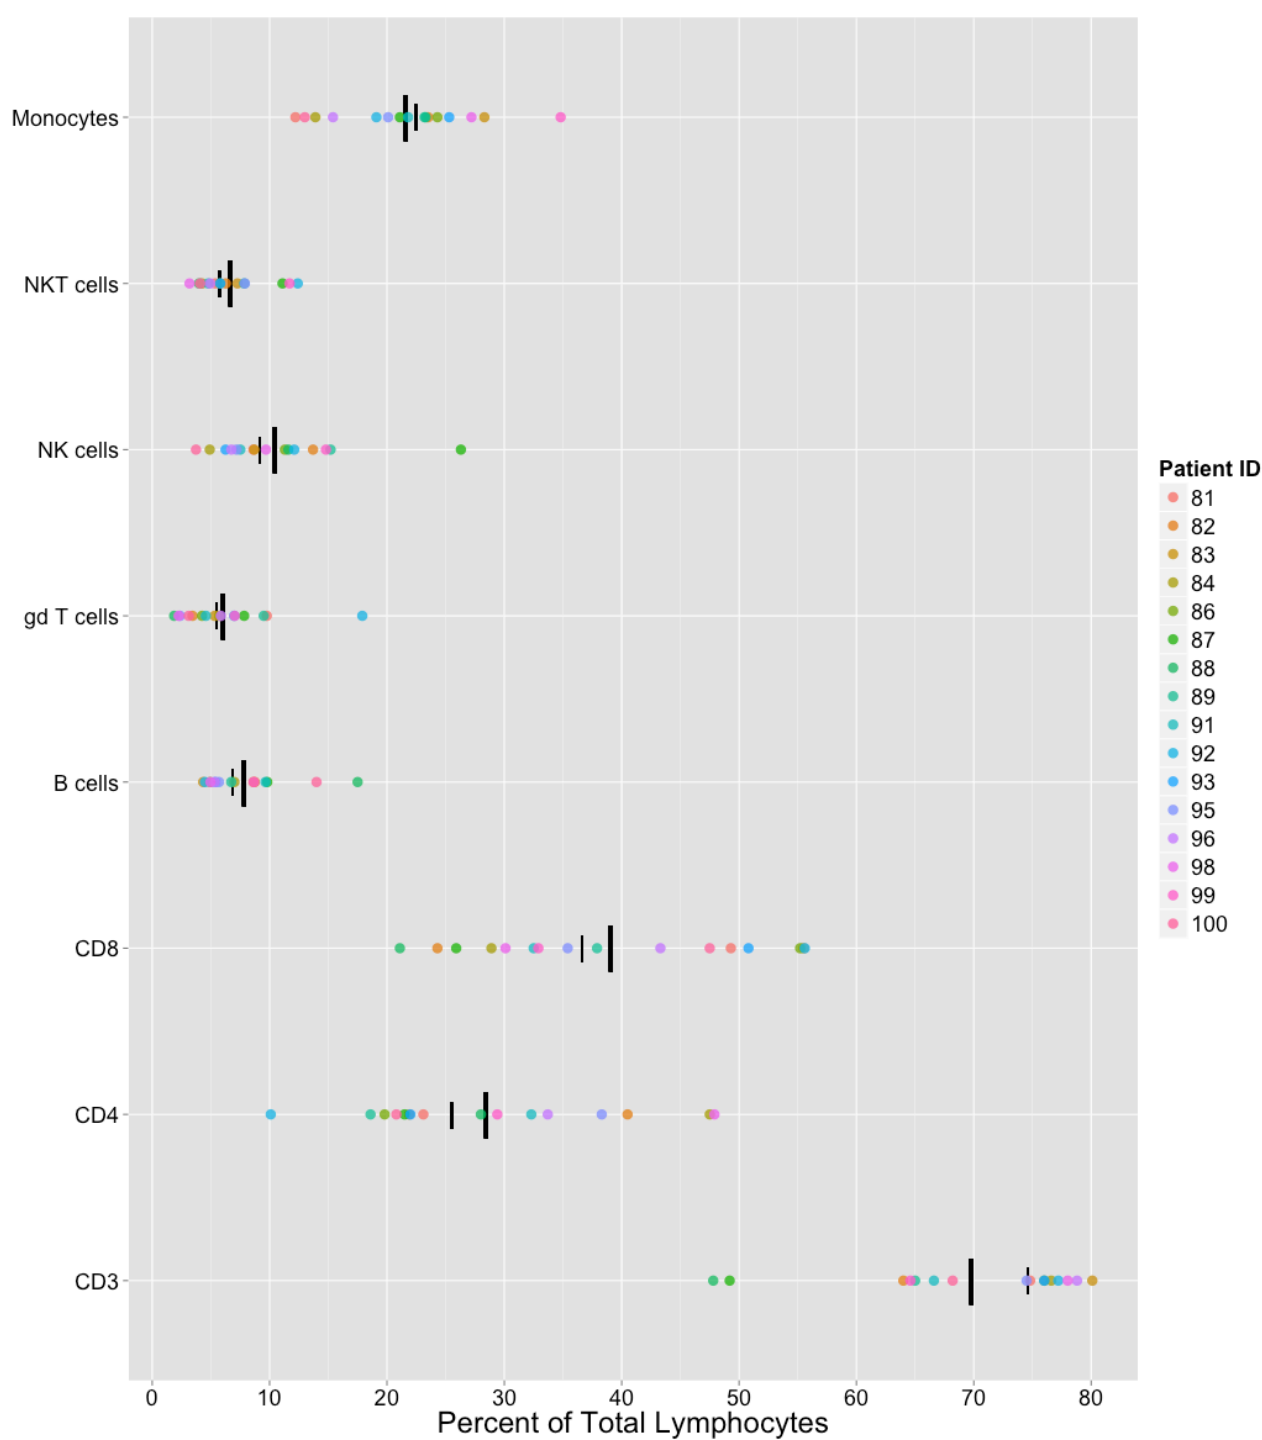

Supplemental Figure 2

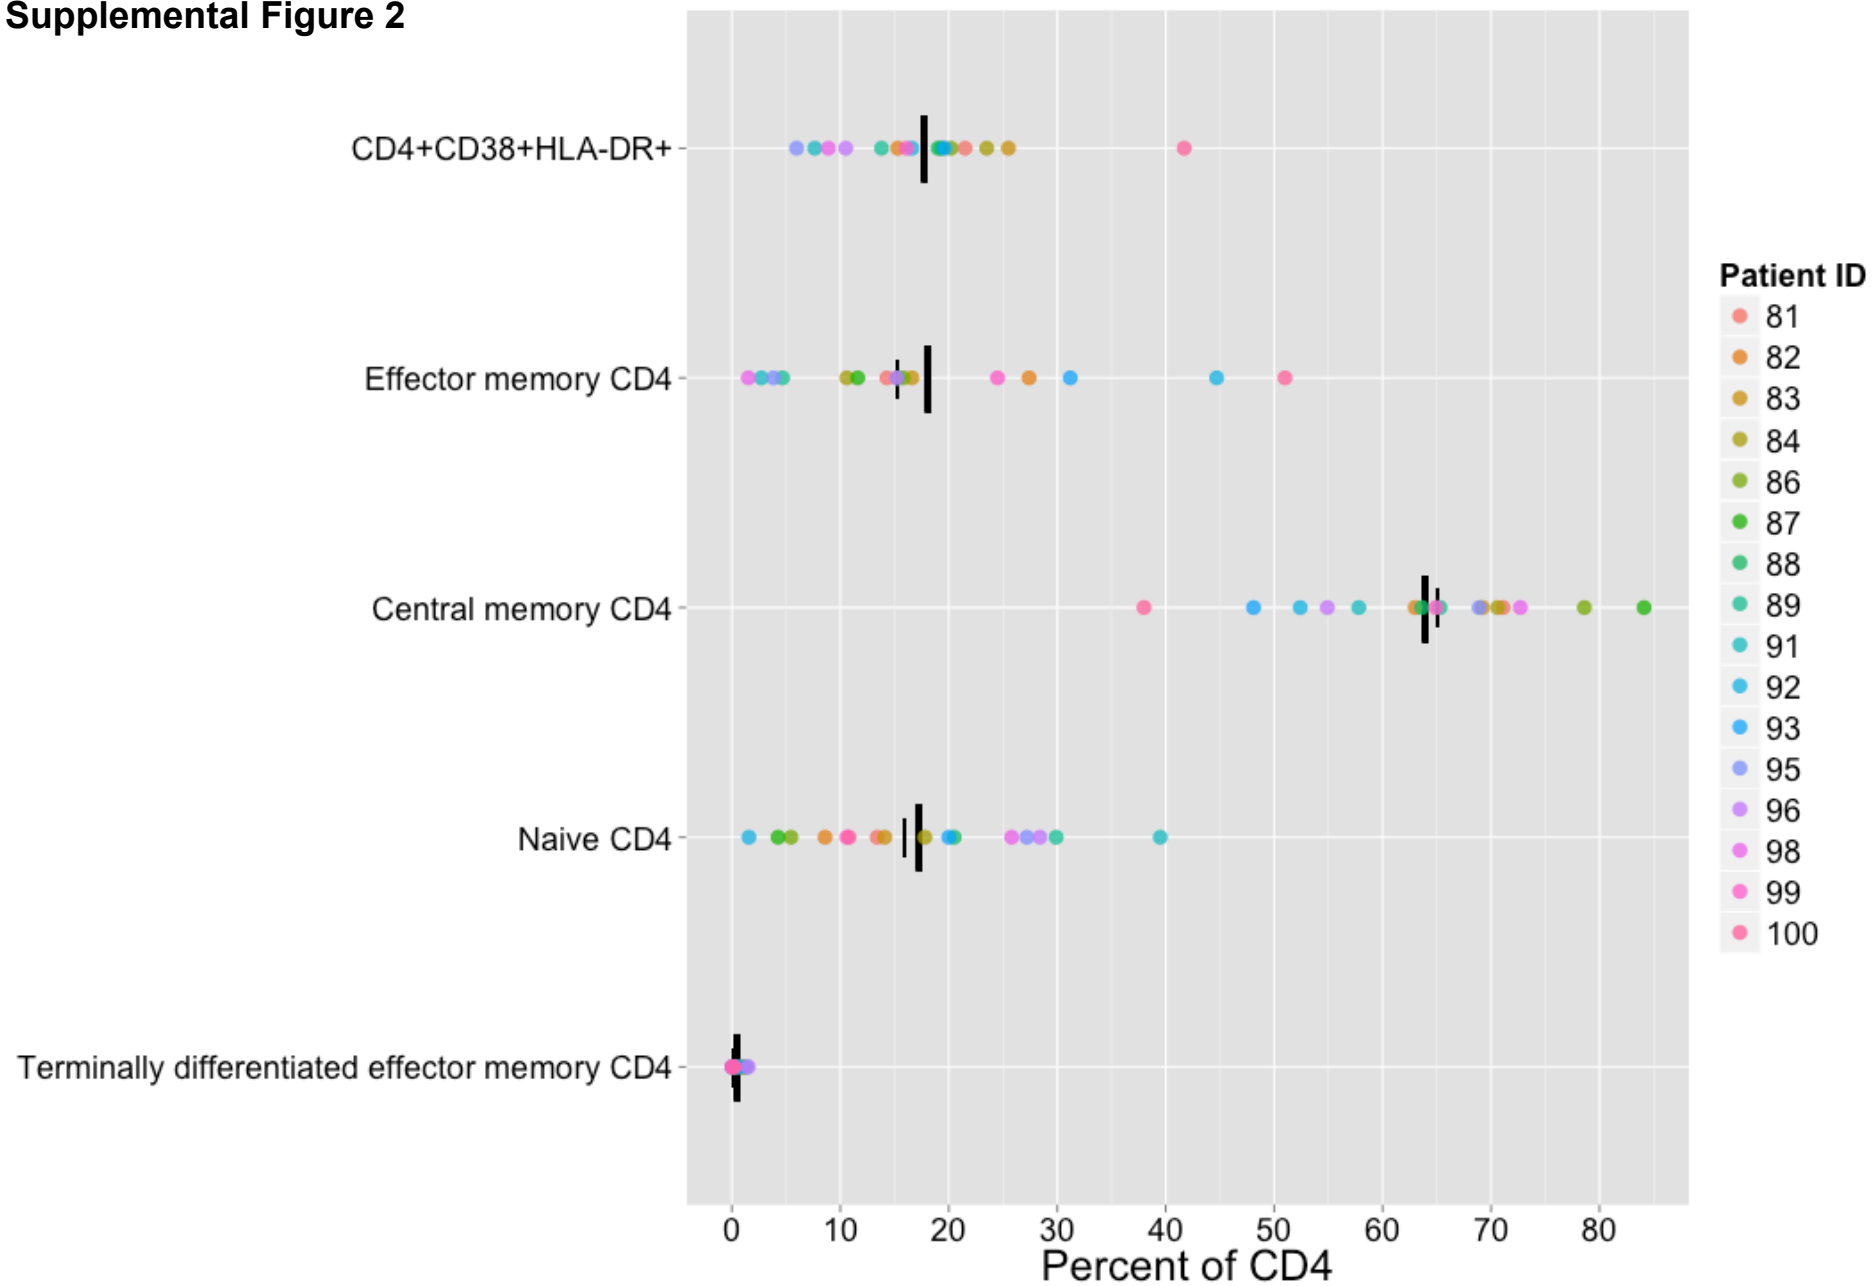



# Supplemental Figure 4

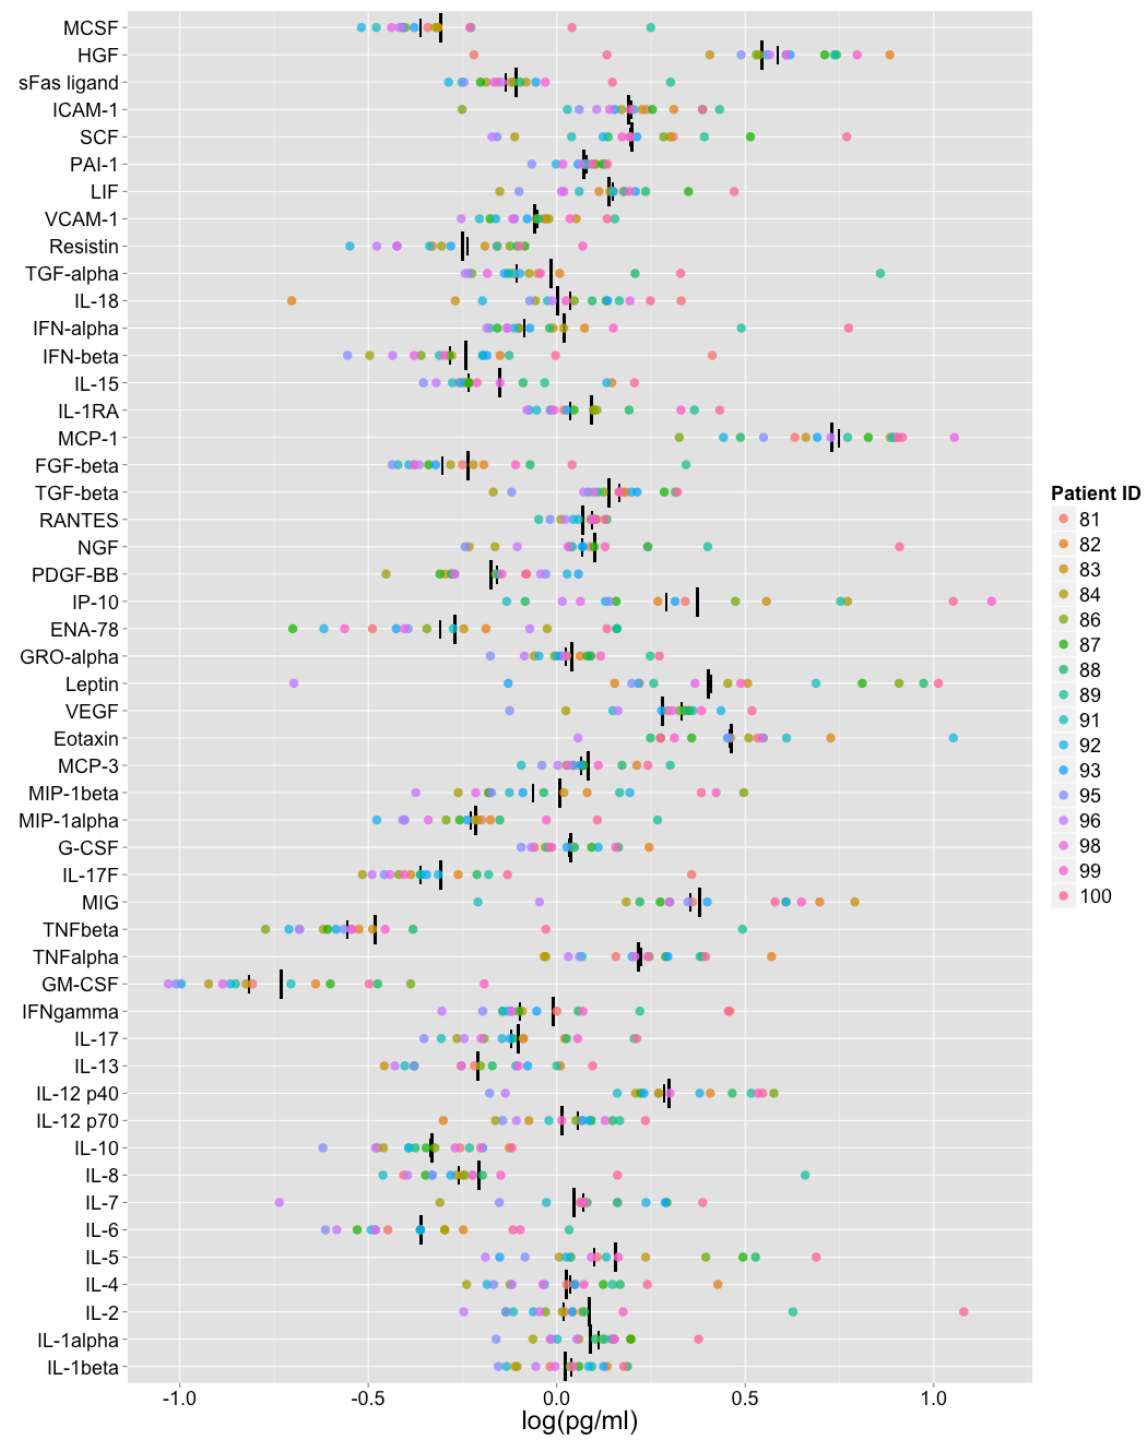

Supplemental Figure 5

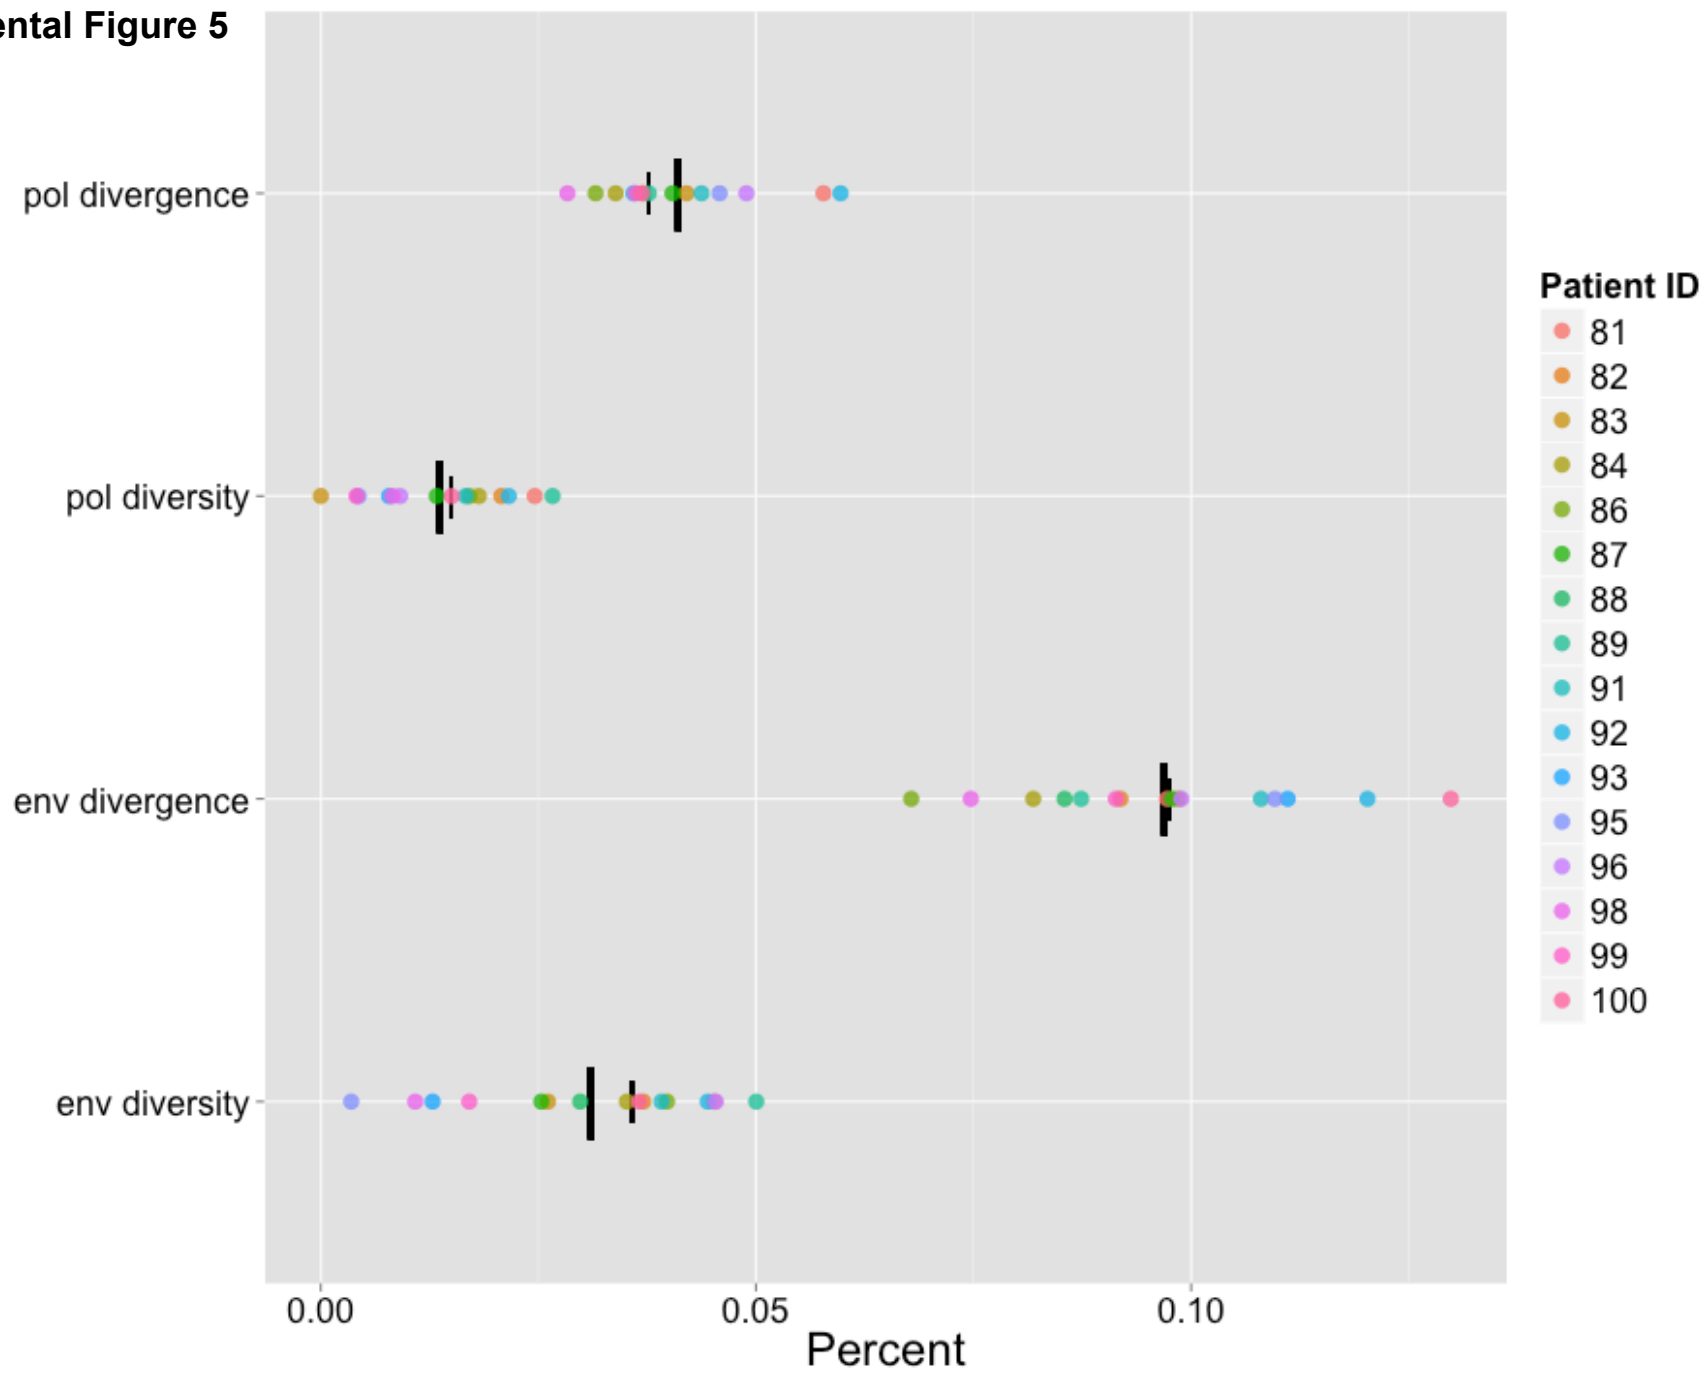

**Supplemental Table 1.** Sequences of primers used in PCR and sequencing reactions.

| Reaction   | Gene       | Primer Name                | Forward/R<br>everse                 | Sequence (5' – 3')                                                   |
|------------|------------|----------------------------|-------------------------------------|----------------------------------------------------------------------|
| PCR Rnd 1  | pol        | maw26<br>1243              | Forward<br>Reverse                  | TTG GAA ATG TGG AAA GGA AGG AC<br>ACT AAG GGA GGG GTA TTG ACA AAC TC |
|            | env        | Env 13<br>Env 1477-<br>94R | Forward<br>Reverse                  | CCA CTC TAT TTT GTG CAT CAG A<br>GGG TGC TAC TCC TAA TGG             |
| PCR Rnd 2  | pol        | Pro-1<br>1205              | Forward<br>Reverse                  | CAG AGC CAA CAG CCC CAC CA<br>CCA GGT GGC TTG CCA ATA CTC TGT CC     |
|            | env        | Env 352-75<br>Env 10a      | Forward<br>Reverse                  | CCA TGT GTA AAA TTA ACC CCA CTC<br>ATT CAC TTC TCC AAT TGT CCC TCA T |
| Sequencing | pol        | Pro-1                      | Forward                             | CAG AGC CAA CAG CCC CAC CA                                           |
|            |            | Seq-2                      | Forward                             | AAT GAG ACA CCA GGG ATT AGA TAT                                      |
|            | 1205       | Reverse                    | CCA GGT GGC TTG CCA ATA CTC TGT CC  |                                                                      |
|            | Seq-1      | Reverse                    | ATA TCT AAT CCC TGG TGT C           |                                                                      |
| env        | Env 352-75 | Forward                    | CCA TGT GTA AAA TTA ACC CCA CTC     |                                                                      |
|            | Env 25     | Forward                    | GTA ATA CCT CAG CCA TTA C           |                                                                      |
|            | Env 10a    | Reverse                    | ATT CAC TTC TCC AAT TGT CCC TCA T   |                                                                      |
|            | Env 22     | Reverse                    | GTG TTG TAA TTT CTA GAT CCC CTC CTG |                                                                      |
